# Supplementary material for: Experiential Education Builds Student Self-Confidence in Delivering Medication Therapy Management
Source: MDPI journal article supplement (doi:10.3390/pharmacy5030039), 2017-07-11
Supplement: s1 [file s1]

# APPE/Rotation Study

Thank you for agreeing to participate in this study today. We appreciate your time and feedback. Below are a series of questions that will help us learn about students in the Pharmacy Program. Please answer the questions to the best of your ability.

Some of these questions will look similar to a survey you may have taken before the start of your rotations this year. This is done to help us understand what knowledge you have gained from the APPE rotations.

Please note that this information will only be used in aggregate and none of the information will identify you as the respondent. The survey length will depend upon your answers and averages about 10 minutes.

---

---

## consent

Please indicate today's date to demonstrate your informed consent to complete this survey.

\_\_\_\_\_  
(MM-DD-YYYY)

---

---

## Experience

Have you worked in a pharmacy in the past 2 years (not including experiential education/rotations)?

- ☐ Yes  
☐ No

What type(s) of pharmacy have you worked in within the past 2 years (not including experiential education/rotations)? Please check all that apply.

- ☐ community chain (e.g., CVS, Walgreens)  
☐ community independent  
☐ community mass merchandiser (e.g., Target, Walmart)  
☐ grocery store (e.g., Price Chopper, Wegmans)  
☐ residency  
☐ fellowship  
☐ graduate school  
☐ hospital  
☐ long term care  
☐ academia  
☐ industry  
☐ managed care  
☐ other

Other work site

\_\_\_\_\_

In the past 2 years, did you work in a pharmacy while classes were in session?

- ☐ Yes  
☐ No

In the past 2 years, approximately how many hours in a typical week did you work in a pharmacy while classes were in session?

\_\_\_\_\_  
( Indicate your best estimate in the box above. )

In the past 2 years, did you work in a pharmacy during the summer or winter breaks?

- ☐ Yes  
☐ No

In the past 2 years, approximately how many hours in a typical week did you work in a pharmacy over summer or winter break?

\_\_\_\_\_  
( Indicate your best estimate in the box above. )

**After graduation, how likely are you to work in each of the following locations? For each site, please indicate your likelihood to work in that location on a scale of 1 to 5 where 5 is Extremely Likely and 1 is Not at all Likely.**

|                             | 1=Not at all<br>Likely | 2                     | 3                     | 4                     | 5=Extremely<br>Likely |
|-----------------------------|------------------------|-----------------------|-----------------------|-----------------------|-----------------------|
| community chain             | <input type="radio"/>  | <input type="radio"/> | <input type="radio"/> | <input type="radio"/> | <input type="radio"/> |
| community independent       | <input type="radio"/>  | <input type="radio"/> | <input type="radio"/> | <input type="radio"/> | <input type="radio"/> |
| community mass merchandiser | <input type="radio"/>  | <input type="radio"/> | <input type="radio"/> | <input type="radio"/> | <input type="radio"/> |
| grocery store               | <input type="radio"/>  | <input type="radio"/> | <input type="radio"/> | <input type="radio"/> | <input type="radio"/> |
| residency                   | <input type="radio"/>  | <input type="radio"/> | <input type="radio"/> | <input type="radio"/> | <input type="radio"/> |
| fellowship                  | <input type="radio"/>  | <input type="radio"/> | <input type="radio"/> | <input type="radio"/> | <input type="radio"/> |
| graduate school             | <input type="radio"/>  | <input type="radio"/> | <input type="radio"/> | <input type="radio"/> | <input type="radio"/> |
| hospital                    | <input type="radio"/>  | <input type="radio"/> | <input type="radio"/> | <input type="radio"/> | <input type="radio"/> |
| long term care              | <input type="radio"/>  | <input type="radio"/> | <input type="radio"/> | <input type="radio"/> | <input type="radio"/> |
| academia                    | <input type="radio"/>  | <input type="radio"/> | <input type="radio"/> | <input type="radio"/> | <input type="radio"/> |
| industry                    | <input type="radio"/>  | <input type="radio"/> | <input type="radio"/> | <input type="radio"/> | <input type="radio"/> |
| managed care                | <input type="radio"/>  | <input type="radio"/> | <input type="radio"/> | <input type="radio"/> | <input type="radio"/> |
| other                       | <input type="radio"/>  | <input type="radio"/> | <input type="radio"/> | <input type="radio"/> | <input type="radio"/> |

After graduation which one site are you most likely to work in, if you had to choose today?

- ☐ community chain (e.g., CVS, Walgreens)  
☐ community independent  
☐ community mass merchandiser (e.g., Target, Walmart)  
☐ grocery store (e.g., Price Chopper, Wegmans)  
☐ residency  
☐ fellowship  
☐ graduate school  
☐ hospital  
☐ long term care  
☐ academia  
☐ industry  
☐ managed care  
☐ other  
 (Select only one answer.)

Other work after graduation

\_\_\_\_\_

What courses have you taken at ACPHS or elsewhere that you think were most helpful in preparing you for your APPE rotations?

\_\_\_\_\_

Why were these classes helpful (or not helpful) to you in retrospect?

\_\_\_\_\_

---

---

**awareness**

Do you know what Medication Therapy Management (MTM) services or programs are?

- ☐ Yes  
☐ No  
☐ Not Sure

In your own words, how would you define MTM?

---

(Please answer to the best of your ability. )

---

**MTM part 2**

---

From the list below, check the box next to the definition(s) that describe your understanding of MTM? You can select multiple definition(s).

- ☐ MTM is patient centric
- ☐ MTM is a comprehensive approach to improving medication use
- ☐ MTM is product centric
- ☐ MTM utilizes a comprehensive medication review
- ☐ MTM saves health insurance companies money
- ☐ MTM allows for an interactive person-to-person, patient and provider conversation
- ☐ MTM can be individualized for each patient
- ☐ MTM can only be delivered by a pharmacist
- ☐ None of these definitions

How did you first learn about MTM?

Are you currently or did you recently complete an APPE in MTM or MTM-related services?

- \_\_\_\_\_
- ☐ Yes
  - ☐ No

Did you complete the APhA MTM certificate training program?

- ☐ Yes
- ☐ No

**Educational Evaluation: For the series of items below indicate your agreement with your abilities at this time, following your APPE rotations. For each question, please use the 1 to 5 scale where 1= strongly disagree and 5= strongly agree. We are looking for your fair assessment of your own skills for each of these items. We do not expect that you will be familiar with them all at this point.**

|                                                                                                                                                                                                                                                          | 1=Strongly<br>Disagree | 2                     | 3                     | 4                     | 5=Strongly<br>Agree   |
|----------------------------------------------------------------------------------------------------------------------------------------------------------------------------------------------------------------------------------------------------------|------------------------|-----------------------|-----------------------|-----------------------|-----------------------|
| I am able to describe the features and benefits of a MTM session when contacting patients to recruit them to participate in a MTM program.                                                                                                               | <input type="radio"/>  | <input type="radio"/> | <input type="radio"/> | <input type="radio"/> | <input type="radio"/> |
| I am able to describe the features and benefits of a MTM session to doctors or other stakeholders at the clinical site.                                                                                                                                  | <input type="radio"/>  | <input type="radio"/> | <input type="radio"/> | <input type="radio"/> | <input type="radio"/> |
| I can prepare for a medication review session with a patient by conducting a preliminary review of prescription medication claims and diagnoses to identify potential medication related problems (MRP) (indication, safety, efficacy, compliance, etc). | <input type="radio"/>  | <input type="radio"/> | <input type="radio"/> | <input type="radio"/> | <input type="radio"/> |
| I am able to complete a medication review session with a patient (either live or telephonically) including identifying the patient's chief complaint, conveying information in a patient appropriate manner, and using open questions.                   | <input type="radio"/>  | <input type="radio"/> | <input type="radio"/> | <input type="radio"/> | <input type="radio"/> |
| I create a personal medication list (PML) for the patient using the web based MTM platform.                                                                                                                                                              | <input type="radio"/>  | <input type="radio"/> | <input type="radio"/> | <input type="radio"/> | <input type="radio"/> |
| I can incorporate primary literature and print/electronic reference sources to create a plan to resolve identified MRPs and/or transfer of information among health practitioners, patients and the general public.                                      | <input type="radio"/>  | <input type="radio"/> | <input type="radio"/> | <input type="radio"/> | <input type="radio"/> |

I can communicate the potential medication related problems (MRP or recommendations) to the patient verbally ☐ ☐ ☐ ☐ ☐

I can communicate potential MRPs in writing to the patient via the Medication Action Plan above (patient friendly language) etc. ☐ ☐ ☐ ☐ ☐

I can prioritize and communicate in writing the potential medication related problems (MRP) and/or recommendations to the physician via a written FARM/SOAP note using the web-based platform. ☐ ☐ ☐ ☐ ☐

I can prioritize and verbally communicate potential medication related problems (MRP or recommendations) to the physician. ☐ ☐ ☐ ☐ ☐

Are you interested or planning to offer MTM services following graduation wherever you will work?

- ☐ Yes  
☐ No

How would you rate your self-confidence today to provide MTM services to patients? Please indicate your confidence on a scale of 1 to 5, where 5 is Extremely Confident and 1 is Not at all Confident?

- ☐ 5=Extremely Confident  
☐ 4  
☐ 3  
☐ 2  
☐ 1=Not at all Confident

Did you complete MTM related services this year on APPEs?

- ☐ Yes  
☐ No  
☐ Not Sure

In which type of APPE did you perform MTM related services?

- ☐ Community Pharmacy  
☐ Inpatient Clinical  
☐ Institutional/Hospital  
☐ Ambulatory Care  
☐ Elective

Who was your preceptor for your APPE sites where you were working on MTM services?

\_\_\_\_\_

Which of the following APPE rotations did you complete this year? Please check all that apply.

- ☐ MTM Elective - Dr. Cerulli  
☐ Ambulatory Care Nephrology - Dr. Cardone  
☐ Neither

---

**For the series of items below, think about your recent APPE rotation that incorporated MTM, and indicate your agreement with your abilities at this time, after your APPE rotation. For each question, please use the 1 to 5 scale where 1=strongly disagree and 5 = Strongly Agree. We are looking for your fair assessment of your own skills for each of these items.**

|                                                                                                      | 1 = Strongly<br>Disagree | 2                     | 3                     | 4                     | 5 = Strongly<br>Agree |
|------------------------------------------------------------------------------------------------------|--------------------------|-----------------------|-----------------------|-----------------------|-----------------------|
| This rotation met my educational needs.                                                              | <input type="radio"/>    | <input type="radio"/> | <input type="radio"/> | <input type="radio"/> | <input type="radio"/> |
| The rotation where I completed MTM encounters with patients added to my development as a pharmacist. | <input type="radio"/>    | <input type="radio"/> | <input type="radio"/> | <input type="radio"/> | <input type="radio"/> |
| This rotation provided me useful skills that should help me obtain a job.                            | <input type="radio"/>    | <input type="radio"/> | <input type="radio"/> | <input type="radio"/> | <input type="radio"/> |

I completed an MTM rotation because

- ☐ I did not know I was doing to MTM during this rotation.  
☐ I want to provide MTM following graduation.  
☐ I wanted to work with that faculty member  
☐ Other

Other reasons for completing a MTM rotation

---

Any other feedback at this time on MTM, the APPE process, or your future plans?

---



---

---

**demographics**

What is your age?

- ☐ 17 and under
- ☐ 18-20
- ☐ 21-23
- ☐ 24-26
- ☐ 27 and older

Sex

- ☐ Male
- ☐ Female
- ☐ Transgender

On what ACPHS campus do you reside?

- ☐ Albany, NY
- ☐ Colchester, VT

What was your highest degree obtained prior to enrolling in the PharmD program?

- ☐ High School Diploma
- ☐ Associate's Degree
- ☐ Bachelor's Degree
- ☐ Master's Degree
- ☐ Doctoral Degree
- ☐ Other

What other degree?

---

What year will you or did you graduate from ACPHS?

- ☐ 2013
- ☐ 2014
- ☐ 2015
- ☐ 2016
- ☐ 2017
- ☐ 2018
- ☐ other

When do you plan to graduate?

---

What is your current professional GPA?

- ☐ 3.5 or greater
- ☐ 3.0-3.49
- ☐ 2.5-2.99
- ☐ 2.0-2.49
- ☐ 1.9 or under

Following graduation what are you current plans?

- ☐ Work at community chain (e.g., CVS, Walgreens)
  - ☐ Work at community independent
  - ☐ Work at community mass merchandiser (e.g., Target, Walmart)
  - ☐ Work at grocery store pharmacy (e.g., Price Chopper, Wegmans)
  - ☐ Complete a residency
  - ☐ Complete a fellowship
  - ☐ Attend graduate school
  - ☐ Work in a hospital pharmacy
  - ☐ Work in a long term care pharmacy
  - ☐ Work in academia
  - ☐ Work in industry
  - ☐ Work in a managed care pharmacy
  - ☐ Other
- (Select only one answer.)

What are your specific graduation plans?

---

---

---

## Incentive Drawing

Thank you for your participation. To thank you for your time and efforts, we would like to enter you in a raffle drawing for 1 of 5 \$20 gift cards.

- ☐ Yes  
☐ No

If you would like to participate in the drawing, please select yes and you will be asked for your contact information. Your email will not be associated with your survey responses and will only be used for the raffle drawing.

In order to be entered in the drawing, please enter your email address into the text box . If you do not want to participate in the raffle, you may skip this question.

---
