# Supplementary material for: Experiential Education Builds Student Self-Confidence in Delivering Medication Therapy Management
Source: Pharmacy (Basel). 2017 Jul 11;5(3):39. doi: 10.3390/pharmacy5030039 (PMC5622351; doi:10.3390/pharmacy5030039)
Supplement: Supplementary file 1 [file pharmacy-05-00039-s001.zip]

Archive with 4 entries (4 files):
- APPERotationStudy DATA W1.xlsx
- APPERotationStudy DATA W2.xlsx
- APPERotationStudy_W1.pdf
- APPERotationStudy_W2.pdf
