# Supplementary material for: Experiential Education Builds Student Self-Confidence in Delivering Medication Therapy Management
Source: Pharmacy (Basel). 2017 Jul 11;5(3):39. doi: 10.3390/pharmacy5030039 (PMC5622351; doi:10.3390/pharmacy5030039)
Supplement: Supplementary file 1 [file pharmacy-05-00039-s001.zip › APPERotationStudy DATA W1.xlsx]

## Sheet: APPE W1 Complete
study_id	redcap_survey_identifier	pretest_survey_timestamp	rxwork	rxtype___0	rxtype___1	rxtype___2	rxtype___3	rxtype___4	rxtype___5	rxtype___6	rxtype___7	rxtype___8	rxtype___9	rxtype___10	rxtype___11	rxtype___12	oth_wrk	rxwksch	rxschhours	rxwkbrk	rxbrkhours	massmerch	indep	mass	groc	resid	fellow	grad	hosp	ltc	acad	ind	mc	oth	workchoice	oth_wrk_grad	courses	mtm	definition	define___1	define___2	define___3	define___4	define___5	define___6	define___7	define___8	define___9	learnmtm
			1	2a	2b	2c	2d	2e	2f	2g	2h	2i	2j	2k	2l	2m	2n	3	3a	4	4a	5a	5b	5c	5d	5e	5f	5g	5h	5i	5j	5k	5l	5m	6	7 (If 12 selected for ?6?)	8/8a SHORT ANSWER	9	9a	10a	10b	10c	10d	10e	10f	10g	10h	10i	11
			Work in Rx?	Com chain	Com indep	Com mass	Grocery	Resid	Fellow	Grad sch	Hospital	LTC	Acad	Industry	Managed Care	Other	other work site?	Wk rx dur sch	Hr wk rx dur sch	Wk rx dur brk	Wk rx dur brk	Lk wk chain	Lk wk indep	Lk wk mass	Lk wk groc	Lw wk resid	Lw wk fellow	Lk wk grad	Lk wk hosp	Lk wk LTC	Lk wk acad	Lk wk ind	Lk wk mc	Lk wk oth	Wk aft grad	Other work aft grad	Courses helpful for APPE	What is MTM?	Define MTM	Pt centric	CM use	Prod centric	CMR	Save HI money	Pt-Pro com	Individualized/pt	Only deliv by PharmD	None of the above	First learn bout MTM
1		2014-05-09 10:48:55	0	0	0	0	0	0	0	0	0	0	0	0	0	0				0		2	2	2	2	1	3	3	3	3	2	5	3	1	10		None	1	Helping patients understand medication and disease states	1	1	0	1	1	1	1	0	0	Job experience
2		2014-05-09 10:57:31	1	1	0	0	0	0	0	0	0	0	0	0	0	0		1	20	1	30	5	4	4	4	1	1	1	3	2	1	1	2	1	0		I don't think any were. I feel completely lost, like I'm being sent out on my own completely unprepared. I wish a class like pharmacy skills or IPS workshop had helped with things we will actually see/do on rotations.	1	Looking at a patient and their disease states and making sure the patient is on the best medications for those disease states. Making sure there are no interactions between the medications. Eliminating unnecessary medications.	1	1	0	1	1	1	1	0	0	some class, not sure which
3		2014-05-09 11:38:51	1	1	0	0	0	0	0	0	0	0	0	0	0	0		1	12	1	25	5	4	4	5	2	2	2	3	4	2	2	2	2	3		All PTPM courses at COLLEGE	1	MTM is doing a comprehensive medication revew with patient and adressing drug related problems and any concerns that patient may have	1	1	0	1	0	1	1	0	0	COLLEGE
4		2014-05-09 11:59:49	1	1	0	0	0	0	0	0	0	0	0	0	0	0		1	15	1	30	5	5	5	5	1	1	1	2	2	2	1	1	1	0		family medicine, all of the PTPM modules, IPS6	1	Working with patients to manage their medication regimens. Also includes counseling patients.	0	1	0	1	0	1	1	0	0	COLLEGE
5		[not completed]	0	0	0	0	0	0	0	0	0	0	0	0	0	0				0		1	3	1	1	1	1	5	4	3	2	3	3	3	6		PTPM taught the basis of my clinical knowledge anf writing SOAPs in IPS taught me how to find, read, and utilize guidelines. The best prep for APPE however was my IPPE experiences. We could sit in a classroom for the next 10 years and still not be as prepared as we would be with actual experiences.			0	0	0	0	0	0	0	0	0
6		2014-05-09 13:56:45	0	0	0	0	0	0	0	0	0	0	0	0	0	0				0		1	1	1	1	2	2	1	3	3	2	3	3	4	12	insurance	Cardio, Endocrine	1	Reviewing patient medication profiles to identify problems. Helping to answer patient questions about medications and optimizing therapy.	1	1	0	1	1	1	1	0	0	COLLEGE
7		2014-05-19 21:28:50	1	0	1	0	0	0	0	0	1	0	0	0	0	0		1	10	1	40	2	3	2	3	4	2	1	4	3	4	3	3	2	4		All required modules, advanced ID, critical care	1	A program where the pharmacist works closely with the patient and physician to review medications for errors and effectiveness. This optimizes patient medication use.	1	1	0	1	1	1	1	0	0	COLLEGE
8		2014-05-09 15:46:32	0	0	0	0	0	0	0	0	0	0	0	0	0	0				0		2	2	2	2	4	4	2	4	3	3	4	4	1	10		PTPM. Healthcare human values, Pharmacoeconomics	1	Pharmacists evaluating a patient's medications and making changes to therapy, or complementing the patient's med list with techniques to optimize tx	1	1	0	1	0	1	1	0	0	School
9		2014-05-10 06:36:30	1	0	1	0	0	0	0	0	0	0	0	0	0	0		0		1	24	3	5	1	1	1	1	1	1	1	4	1	1	1	1		Workshop Skills lab Disease specific modules	1	A review of a patients medications specific to disease states and all required counseling points. At the end of an MTM session a patient should have a full understanding of all their medications, including why they take them and how to take them.	1	1	0	1	1	1	1	0	0	Workshop
10		2014-05-10 14:09:48	1	0	0	1	0	0	0	0	0	0	0	0	1	0		1	8	1	30-40	3	3	5	4	3	1	1	1	3	1	1	5	1	11		cardio, neuro, economics	1	helping patients to fully understand and optimize their medications; checking medications for safety and efficacy	1	1	0	1	1	1	1	0	0	school
11		2014-05-11 00:42:19	1	1	0	0	0	0	0	0	0	0	0	0	0	0		1	2015-10-15	1	40+	5	3	1	1	4	1	3	3	1	1	1	1	1	0		Neuro/Psych, Cardio were the best taught modules so definitely those. I would also say Skills Lab, even though the class itself was run poorly. I took a decent amount from that class that I believe would help.	1	A counseling service for pharmacists to provide specialized care to patients focusing on their medications and conditions.	1	1	0	1	1	1	1	0	0	COLLEGE
12		2014-05-11 17:22:10	1	0	1	0	0	0	0	0	0	0	0	0	0	0		1	12	1	20	2	4	1	4	4	1	1	4	2	3	1	1	1	4		MTM Certification, Modules, Pharmacy Skills Lab	1	A service provided to patients where they typically have a Comprehensive Medication Review (CMR) once a year, in which a healthcare professional (usually a pharmacist) interviews the patient and discusses with them their current medications and evaluates the current medicine regimens efficacy/safety, as well trying to identify areas to either decrease costs to the patient, optimize appropriate th…	1	1	0	1	1	1	1	0	0	Dr. L
13		2014-05-12 09:07:09	1	1	0	0	0	0	0	0	0	0	0	0	0	0		1	30	1	40	5	4	3	4	4	1	1	1	1	5	1	1	1	0		Family medicine was very helpful	1	It is a comprehensive medication review to go over patients medications and labs to make sure they are at goal and everything is going well with their medications.	1	1	0	1	0	1	1	0	0	Rite aid
14		2014-05-12 10:12:03	0	0	0	0	0	0	0	0	0	0	0	0	0	0				1	30	4	2	2	4	5	3	1	5	5	2	2	2	2	4		Cardio and Neuropsych PTPMs	1	Pharmacist meets with a patient and goes over all their medications and medical history, as well as complaints, and finds solutions to rework the patients medications and overall care, reports to prescribes for feedback, and changes are implemented	1	1	0	1	1	1	1	0	0	School
15		2014-05-12 10:13:54	0	0	0	0	0	0	0	0	0	0	0	0	0	0				0		3	2	1	2	4	4	2	4	1	1	3	2	1	4		Family Medicine Elective	2	MTM programs are where a pharmacists interviews and reviews a patients medication list and tries to identify potential problems or interactions that the person can take to their doctor and see if changes need to be made.	1	1	0	1	1	1	1	0	0	school
16		2014-05-12 11:52:59	1	1	0	0	0	0	0	0	0	0	0	0	0	0		1	25	1	38	5	4	2	2	1	1	1	3	2	4	1	3	1	0		IPS (especially 6), Lab 1-2, Lab 4-6 (but would be better if more organized), health care an human values (although I think may of my classmates would have benefited by Dr.X was different than most - it was very open and accepting of differences.)	1	It is when a patient goes through their medications, side effects, questions and opinions on their medications with a qualified expert that has reviewed the patient's medical history, labs, and medication history to optimize patient treatment and success.	1	1	0	1	1	1	1	0	0
17		2014-05-12 19:22:05	1	0	1	0	0	0	0	0	0	0	0	0	0	0		0		1	36	2	3	1	2	5	1	2	3	2	3	2	2	2	4		IPS Workshops, family medicine, Skills Lab 6 and the PTPM Modules	1	MTM is a process by which a pharmacist can engage a patient one-on-one to discuss medications/regimens and provide information to questions/concerns while also identifying MRPs and providing recommendations.	1	1	0	1	1	1	1	1	0	Skills Lab
18		2014-05-13 16:07:50	1	0	0	0	0	0	0	0	0	0	0	0	0	1	Mail Order - Express Scripts	0		1	40	5	5	5	5	1	1	1	5	5	1	1	5	1	1		PTPM Modules minus the pathophysiology portion - Past IPPE rotations - IPS classes	1	Pharmacists collaborating with other healthcare professionals in order to optimize patient therapy and to improve patient outcomes.	1	1	0	1	1	1	1	0	0	COLLEGE
19		2014-05-14 12:19:09	0	0	0	0	0	0	0	0	0	0	0	0	0	0				0		1	2	1	2	5	4	1	2	2	3	2	1	1	4		all modules	1	counseling medicare patients on their new medications and finding drug related problems such as overdose, indication without medication etc.	1	1	0	1	0	1	1	0	0	respiratory class
20		2014-05-14 12:20:21	0	0	0	0	0	0	0	0	0	0	0	0	0	0				1	20	5	4	4	4	1	1	1	4	1	1	1	1	1	0		IPS workshop 6	1	When a pharmacist reviews all prescriptions, herbals, OTC drugs with a patient to make sure their is an indication and all the dosages, drugs, etc. are correct.	1	1	0	1	1	1	1	1	0	class
21		2014-05-14 12:50:35	1	1	0	0	0	0	0	0	0	0	0	0	0	0		1	8	1	30	3	3	3	4	5	3	2	4	3	3	4	4	3	4		PTPM modules.	1	Complete medication therapy management via CMRs, targeted reviews, and general therapy optimization.	1	1	0	1	1	1	1	1	0	Through work and school.
22		2014-05-14 12:56:39	1	0	1	0	0	0	0	0	0	0	0	0	0	0		0		1	40	3	3	3	3	1	5	3	2	1	2	5	1	4	5		Probably all of the PTPM Modules especially the cardiovascular module.	1	A brilliant idea for pharmacists to thoroughly examine the current medication regimen a certain patient. It may help discover potential drug interactions and adverse effects. Since pharmacists are the drug experts, they would be best to do such a task of MTM. The recommendations, if any that a pharmacist may have during an MTM session, can get faxed or sent another way to the prescriber	1	1	0	1	1	1	1	0	0	IPS Workshop
23		2014-05-14 14:37:34	0	0	0	0	0	0	0	0	0	0	0	0	0	0				0		3	3	2	3	3	3	1	4	4	1	1	3	1	7		MTM	1	Help patients to manage their medications to improve their health outcome and their adherence to medication	1	1	0	1	1	1	1	0	0	PTPM
24		2014-05-14 15:32:21	0	0	0	0	0	0	0	0	0	0	0	0	0	0				0		4	4	4	4	2	3	2	3	3	2	3	2	2	7		Workshop	1	Provide the patient with information about the medications they are taking such as indication, side effects drug interaction, what happens if they miss a dose, etc.	1	1	0	1	0	1	1	1	0	During Respiratory module
25		2014-05-14 15:52:19	1	0	0	0	0	0	0	0	1	0	0	0	0	0		0		1	20	5	4	4	4	3	3	3	4	4	2	4	4	3	0		electives such as critical care	1	when looking all all pts medication and finding drug - drug interactions, adherence, overuse or undersuse.	1	1	0	1	1	1	1	0	0	from our elective course on MTM
26		2014-05-14 16:33:17	0	0	0	0	0	0	0	0	0	0	0	0	0	0				0		4	4	1	4	3	1	1	4	2	1	1	1	1	0		Pharmacy Administration Pharmacoeconomics PTPM Modules Pharmacy Skills Lab	1	Medication Therapy Management is the process of providing patients with a means to more efficiently and accurately manage their medications through proper counseling and education.	1	1	0	1	1	1	1	1	0	Pharmacy school
27		2014-05-14 18:00:35	1	1	0	0	0	0	0	0	0	0	0	0	0	0		1	20	1	40	5	1	1	1	1	1	3	3	3	1	3	3	1	0		Self care, PSL, cardio, oncology	1	An outpatient pharmacy based service that provides a thorough review of a patient's medication history to determine the most appropriate drug therapy suited for optimal health outcomes. It involves but not limited to effective drug regime, drug drug interactions, drug food interactions, otc interactions, side effects, consolidation of drugs to decease drug load and improve compliance.	1	1	0	1	1	1	1	0	0	Dr. E
28		2014-05-14 22:04:58	1	1	0	0	0	0	0	0	0	0	0	0	0	0		1	4	1	40	5	2	1	4	1	1	1	1	1	1	1	1	1	0		PSL and PTPM Modules	1	MTM means Medication Therapy Management. Basically, it's geared towards patient specific and allows opportunities for pharmacists to help patients managed their medications. MTM usually takes longer than just counseling new medications in the pharmacy. MTM takes about 20-30 minutes and pharmacists have to fill out forms that must be submitted to the patient's insurance company to let them know th…	1	1	0	1	1	1	1	0	0	During PTPM modules
29		2014-05-15 14:07:32	1	0	0	0	1	0	0	0	0	0	0	0	0	0		0		1	40	5	2	2	5	5	2	2	3	2	1	1	1	1	3		PTPM	1	Program designed to help patients with complicated medications regimens better manage their medications and ensure the therapies they are on are appropriate and to ensure compliance with medications	1	1	0	1	1	1	1	0	0	Work
30		2014-05-15 16:12:55	1	1	0	0	0	0	0	0	0	0	0	0	0	0		1	13	1	30	5	4	3	4	1	1	1	1	1	3	1	1	2	0		PTPM modules	1	MTM is a pharmacist's chance to optimize patient therapy, improve adherence, improve outcomes, and save the patient money. MTM is the best way for pharmacists to get more involved in patient care and show patient's that we have more to offer than simply checking prescriptions.	1	1	0	1	1	1	1	0	0	IPPE Community rotation
31		[not completed]		0	0	0	0	0	0	0	0	0	0	0	0	0																								0	0	0	0	0	0	0	0	0
32		2014-05-15 17:54:30	1	1	0	0	0	0	0	0	0	0	0	0	0	0		1	12	1	12	5	1	1	3	1	1	1	1	1	1	1	1	1	0		All are relevant	1	Reviewing patient's list of medication to ensure all are correct medications for their indications and to help patients be adherent to their medications as well.	1	1	0	1	1	1	1	0	0	School
33		2014-05-15 18:26:10	0	0	0	0	0	0	0	0	0	0	0	0	0	0				0		2	1	1	2	5	2	2	4	3	5	1	2	1	4		My elective: New Drug Therapies	1	Managing patient's medications, making sure they are taking the appropriate drug for their disease. Making sure patients can afford the medications.	1	1	0	1	0	1	1	0	0	AMCP
34		2014-05-15 23:55:35	1	0	0	1	0	0	0	0	0	0	0	0	0	0		1	20	1	40	5	4	5	5	2	1	1	4	3	2	2	3	1	2		PTPM courses, immunization, MTM	1	A program to increase patient understanding of the medications they are taking. A program to increase patient compliance and safety.	1	1	0	1	1	1	1	0	0	Community IPPE rotation
35		2014-05-16 11:26:36	1	0	0	0	0	0	0	0	1	0	0	0	0	0		1	15	1	15-30 hours	4	4	4	4	1	1	1	5	4	3	1	3	3	7		Skills Labs Health Care and Human Values Self Care IPS 5 and 6	1	MTM is a thorough review of a patient's medication profile. We would be looking for drug interactions and medication duplications. We would ensure they are receiving proper therapeutic dosages. MTM is also a good opportunity to communicate with the patient about the importance of compliance and to gain a solid relationship with them.	1	1	0	1	0	1	1	1	0	COLLEGE
36		2014-05-16 14:57:09	0	0	0	0	0	0	0	0	0	0	0	0	0	0				0		5	4	5	5	1	1	1	2	2	3	2	2	3	0		Self care, all Modules, Skills lab	1	It is done by pharmacists to help patient's get the largest benefit from the medications they are taking.	1	1	0	1	0	1	1	0	0	Respiratory Module
37		2014-05-16 17:42:51	1	0	1	0	0	0	0	0	0	0	0	0	0	0		1	8	1	20	1	4	1	2	5	1	1	2	1	1	1	2	1	7		IPS, Skills Lab 4	1	Review patient medication list for appropriateness and effectiveness	1	1	0	1	1	1	1	0	0	Respiratory module
38		[not completed]		0	0	0	0	0	0	0	0	0	0	0	0	0																								0	0	0	0	0	0	0	0	0
39		2014-05-18 13:19:24	1	1	0	0	0	0	0	0	0	0	0	0	0	0		0		1	40	5	4	1	5	2	3	1	2	2	2	3	2	2	0		PSL 3 and 4	1	A pharmacy service where a patients medications are reviewed to ensure medications are safe, therapeutic, and cost effective.	1	1	0	1	1	1	1	0	0	Work
40		2014-05-18 14:02:58	1	0	0	0	0	0	0	0	1	0	0	0	0	0		0		1	40	1	1	1	1	1	1	1	4	1	1	4	1	1	7		cardio	0		0	0	0	0	0	0	0	0	1	havent
41		2014-05-18 20:23:49	0	0	0	0	0	0	0	0	0	0	0	0	0	0				1	40	5	5	1	5	1	1	1	3	1	1	1	1	1	1		Selfcare	1	compliance	1	0	0	0	0	0	0	0	0	school
42		2014-05-19 14:06:21	1	1	0	0	1	0	0	0	0	0	0	0	0	0		1	15	0		3	1	2	2	3	3	2	2	2	2	3	2	1	5		Independent research study Neuropsychiatric PTPM Infectious Diseases PTPM Endocrine PTPM	1	Helping patients reassess and gather their drug records to see if there are any duplicate therapies or unnecessary therapies while helping patients form an administration plan to maintain or increase compliance	1	1	0	1	0	1	1	1	0	MTM certificate
43		2014-05-19 14:41:42	1	1	0	0	0	0	0	0	0	0	0	0	0	0		1	10-15 hours	1	30-40 hours	5	4	5	5	2	2	3	3	3	1	1	3	3	0		All the science courses, if they weren't as fast pace but more condensed.	1	Reviewing patient's medications who are on several different types and trying to condense the amount or regimen and doing a complete workup and managing a patients medications.	1	1	0	1	1	1	1	0	0	Dr. L
44		[not completed]		0	0	0	0	0	0	0	0	0	0	0	0	0																								0	0	0	0	0	0	0	0	0
45		2014-05-19 15:04:15	1	1	0	0	0	0	0	0	0	0	0	0	0	0		1	3	1	32	5	3	4	4	2	1	1	4	3	2	2	3	1	0		N/a	1	Review patient medication record and provide possible interventions to prevent ADEs and promote better health outcomes.	1	1	0	1	1	1	1	0	0	School
46		[not completed]	1	0	1	0	0	0	0	0	0	0	0	0	0	0		0		1	25	1	2	1	1	5	1	1	5	1	2	1	1	1	4		PPTM modules & IPS workshop	1	A review of a patients medications through a one on one session and identification of any medication problems or changes that should be made.	0	0	0	0	0	0	0	0	0
47		2014-05-19 16:52:24	1	0	1	0	0	0	0	0	1	0	0	0	0	0		0		1	40 hrs	5	4	4	5	1	1	1	4	1	1	1	1	1	3		self care, cardio	1	Is reviewing a patients medication profile to make sure that all the medications have an appropriate indication and there are no drug-drug interactions. Also, compliance and appropriate strength of medication is verified.	1	1	0	1	1	1	1	0	0	classes
48		2014-05-19 16:30:53	0	0	0	0	0	0	0	0	0	0	0	0	0	0				0		4	4	4	4	2	2	4	2	2	2	2	2	2	6		Skills Lab; IPS	1	providing the safest and the most cost-effective medications to patients	1	1	0	1	1	1	1	1	0	MTM certificate course
49		2014-05-19 16:34:48	0	0	0	0	0	0	0	0	0	0	0	0	0	0				0		4	4	4	4	2	3	4	3	3	3	4	5	4	11		Integrated problem solving Pharmaceutical skills labs PTPM modules	1	providing safest and most cost effective evidence based medication therapy.	1	1	0	1	1	1	1	0	0	PTPM modules
50		2014-05-19 17:12:18	1	0	0	0	1	0	0	0	0	0	0	0	0	0		1	8	1	20	4	4	4	4	1	1	1	3	3	1	2	1	4	12	compounding	cardiology, neuropsych,	1	one on one patient centered care focusing on helping to simplify and educate the patient on multiple drug therapies.	1	1	0	1	0	1	1	0	0	school
51		2014-05-19 17:27:37	1	0	0	1	0	0	0	0	0	0	0	0	0	0		0		1	40	3	2	5	2	1	1	1	4	1	1	1	4	1	2		Ptpm modules and skills lab	1	Pharmacist helping patient understand side effects, interactions and disease management. Providing counseling to improve patient compliance and prevent errors. Providing preventive measures such as immunizations.	1	1	0	1	1	1	1	0	0	School
52		2014-05-19 18:06:54	1	1	1	0	0	0	0	0	0	0	0	0	0	0		1	20	1	40	5	5	4	4	2	1	1	3	2	2	2	3	1	0		Cardio PTPM, IPS 5, Neuro PTPM	1	MTM provide the service for patients of a pharmacist thoroughly discussing and going over their medications as they pertain to their specific disease states. Pharmacists are able to address, answer and streamline and concerns or questions that may arise for the patient. This could prevent medication errors and promote better patient health outcomes.	1	1	0	1	1	1	1	0	0	At work in an independent-community setting
53		2014-05-19 18:07:11	1	1	0	0	0	0	0	0	0	0	0	0	0	0		1	10	1	25	2	1	2	2	5	3	4	4	4	4	2	2	1	4		PTPM Cardio, Nephro	1	MTM stands for Medication Therapy Management and it is when a pharmacist sits down with a patient and goes over all of their medications with them	1	0	0	1	0	1	1	0	0	from a peer
54		2014-05-19 18:51:03	1	1	1	0	0	0	0	0	0	0	0	0	0	0		1	11	1	40	4	3	1	4	4	1	1	3	3	1	1	2	2	4		IPS workshop, cardiovascular, infectious disease	1	Spending one on one time with patients, reviewing their medication charts and developing plans to ensure better outcomes for those patients.	1	1	0	1	1	1	1	0	0	Work
55		2014-05-19 21:27:56	1	0	0	0	1	0	0	0	0	0	0	0	0	0		0		1	40 hours/week	2	2	2	4	5	2	2	4	4	4	1	1	1	4		IPS workshop, New Drugs Elective,	1	Comprehensive drug review between pharmacist and patient	1	1	0	1	1	1	1	0	0	DI
56		2014-05-19 22:20:01	1	1	0	0	0	0	0	0	0	0	0	0	0	0		1	12	1	25	5	3	3	3	3	3	3	3	3	3	3	3	3	7		Lab	0		0	1	0	1	1	1	1	0	0	School
57		2014-05-19 23:42:24	1	0	1	0	0	0	0	0	0	0	0	0	0	0		0		1	30	2	3	3	2	2	4	4	2	1	1	4	3	3	10		Topics in public health; Teaching and Learning in Higher Education	1	optimizing patient's medication therapy. Ensuring patient's medications are consistent from what they are taking to whats on the chart.	1	1	1	1	1	1	1	1	0	Learning from professors
58		2014-05-20 00:47:26	0	0	0	0	0	0	0	0	0	0	0	0	0	0				0		4	4	1	4	1	1	1	5	1	1	1	1	1	7		PTPM modules	0		0	0	0	1	0	0	0	0	0	School
59		2014-05-20 00:57:12	0	0	0	0	0	0	0	0	0	0	0	0	0	0				0		5	3	4	4	1	1	1	3	3	2	2	2	1	0		ALL	1	Providing individual therapeutic monitoring pertaining to drug interactions, therapy, and lifestyle modifications	1	1	0	1	1	1	1	0	0	Pharmacy school
60		2014-05-20 01:12:54	1	1	0	0	0	0	0	0	0	0	0	0	0	0		1	17	1	32	4	1	1	1	4	1	1	4	1	1	1	1	1	4		Certain ptpm modules like endocrine and cardio	1	Intensive session between patient and pharmacist where medication regimen is reviewed then optimized either by counseling patient and/or discussing potential changes with provider.	1	1	0	1	1	1	1	0	0	APhA
61		2014-05-20 09:53:37	1	1	0	0	0	0	0	0	1	0	0	0	0	0		1	35	1	40+	5	4	4	5	5	5	4	5	4	4	3	2	1	4		All of the module courses have helped in the APPE rotations	1	Going over the patients medication profile in order to better assess how the patient should continue their medications	1	0	0	0	0	0	0	0	0	Seminar
62		2014-05-20 13:19:08	1	0	0	0	1	0	0	0	0	0	0	0	0	0		1	12hours	1	12hours	5	5	4	5	2	2	2	4	3	2	4	4	3	3		Skills lab/lecture, Infectious diseases, pharmacy administration, majority of all courses taken	1	An extension of healthcare services provided by pharmacist that is within their scope of practice	1	1	0	1	0	1	1	0	0	College
63		2014-05-20 15:13:38	1	0	0	0	1	0	0	0	0	0	0	0	0	0		0		1	16	5	5	5	5	1	3	2	3	2	3	1	3	1	3		PTPM modules	1	.	1	1	0	0	0	1	1	1	0	IPS
64		2014-05-20 20:07:42	1	0	0	0	0	0	0	0	1	0	0	0	0	0		1	8	1	32	3	4	1	4	2	1	1	4	3	1	4	4	3	7		All the classes, including electives.	1	It's a service whereby the pharmacist help managed a patient's medication regimen. This includes appropriate drug for specific disease, appropriate use of drug or device, drug compliance, counseling, communication with patient's provider, and providing emotional support for the patient.	1	1	1	0	1	1	1	0	0	At the pharmacy school
65		[not completed]	1	1	0	0	0	0	0	0	0	0	0	0	0	0		0		1	100	4	2	3	1	5	1	1	1	1	1	1	1	1	4		Skills lab and PTPM	1	managing medication of a patient keeping the goals of diseases in mind	1	0	0	0	0	0	0	0	0	2 years ago
66		2014-05-20 21:47:46	1	1	0	0	0	0	0	0	0	0	0	0	0	0		1	24	1	40	5	4	5	5	3	3	2	2	2	2	2	2	3	0		Certain parts of PSL were helping in learning devices that is useful as well as getting a counseling procedure down. Most of the useful parts were in the earlier PSL classes though in the P1 year.	1	MTM is a healthcare service provided by pharmacists well as other healthcare professionals to help optimize a therapy of patients all aspects of their medications.	1	1	0	1	0	1	1	0	0	COLLEGE
67		2014-05-22 16:16:14	1	0	1	0	0	0	0	0	1	0	0	0	0	0		1	12	1	40	4	2	3	3	2	1	1	4	2	2	1	2	1	0		All PTPM moduls, IPS workshop	1	It is a comprehensive review of a patient's medication list. It may be as little as checking for potential interactions and identifying an indication for each medication. Or more thorough which involves assessing lab values and the patient's compliance with their regimen and, using clinical judgement along with standardized guidelines to maximize a patient's current therapy.	1	1	0	1	1	1	1	1	0	On an IPPE rotation with Dr. A
68		2014-05-22 21:08:46	1	0	0	0	0	0	0	0	1	0	0	0	0	0		1	15	1	40	1	2	1	1	5	2	2	2	2	2	2	2	2	4		I believe all classes have had some impact in preparing a baseline for rotations.	1	Scheduled time in which patient and a pharmacy staff agree to meet to go over medications in an organized fashion that includes lab information, patient history and medication history to determine if the current medication regimen is appropriate in terms of best choice of therapy, cost and patient preference.	1	1	1	1	1	1	1	1	0	School
69		[not completed]	0	0	0	0	0	0	0	0	0	0	0	0	0	0				0		4	3	2	5	2	1	1	4	4	1	2	2	3	3		Skills Lab	1	Going through a patient's medications and changing their therapy based on drug interactions, compliance, effectiveness, and other information to provide the patient with the best possible care.	1	1	0	1	0	1	1	1	0	classes
																					A	3.69697	3.13636	2.63636	3.31818	2.59091	1.84848	1.71212	3.15152	2.34848	2.04545	2.01515	2.21212	1.69697
																					STD	1.41388	1.21385	1.49498	1.40504	1.54897	1.1265	1.03426	1.14007	1.11621	1.10149	1.18312	1.14375	0.976173
[truncated: 28 more columns]
