# Supplementary material for: Experiential Education Builds Student Self-Confidence in Delivering Medication Therapy Management
Source: Pharmacy (Basel). 2017 Jul 11;5(3):39. doi: 10.3390/pharmacy5030039 (PMC5622351; doi:10.3390/pharmacy5030039)
Supplement: Supplementary file 1 [file pharmacy-05-00039-s001.zip › APPERotationStudy DATA W2.xlsx]

## Sheet: APPE W2 Complete
study_id	redcap_survey_identifier	post_test_survey_timestamp	rxwork	rxtype___0	rxtype___1	rxtype___2	rxtype___3	rxtype___4	rxtype___5	rxtype___6	rxtype___7	rxtype___8	rxtype___9	rxtype___10	rxtype___11	rxtype___12	oth_wrk	rxwksch	rxschhours	rxwkbrk	rxbrkhours	massmerch	indep	mass	groc	resid	fellow	grad	hosp	ltc	acad	ind	mc	oth	workchoice	oth_wrk_grad	courses	courses2_7dc	mtm	definition	define___1	define___2	define___3	define___4	define___5	define___6	define___7	define___8	define___9
			1	2a	2b	2c	2d	2e	2f	2g	2h	2i	2j	2k	2l	2m	2n	3	3a	4	4a	5a	5b	5c	5d	5e	5f	5g	5h	5i	5j	5k	5l	5m	6	7 (If 12 selected for ?6?)	8	8a	9	9a	10a	10b	10c	10d	10e	10f	10g	10h	10i
			Work in Rx?	Com chain	Com indep	Com mass	Grocery	Resid	Fellow	Grad sch	Hospital	LTC	Acad	Industry	Managed Care	Other	other work site?	Wk rx dur sch	Hr wk rx dur sch	Wk rx dur brk	Wk rx dur brk	Lk wk chain	Lk wk indep	Lk wk mass	Lk wk groc	Lw wk resid	Lw wk fellow	Lk wk grad	Lk wk hosp	Lk wk LTC	Lk wk acad	Lk wk ind	Lk wk mc	Lk wk oth	Wk aft grad	Other work aft grad	Courses helpful for APPE	Why were the classes helpful?	What is MTM?	Define MTM	Pt centric	CM use	Prod centric	CMR	Save HI money	Pt-Pro com	Individualized/pt	Only deliv by PharmD	None of the above
1		2015-05-04 17:17:17	0	0	0	0	0	0	0	0	0	0	0	0	0	0				1	40	1	1	1	1	5	5	5	5	5	5	5	1	1	4		Therapeutic modules. A pharmacogenomics class and a critical care lecture would have been very beneficial before APPEs. I did a rotation in the south /Midwest and other pharmacy students excelled in those topics compared to myself and my background.	All the therapeutics classes provided a framework for the rotation modules.	2	Counseling patients on their medications , and looking for interactions, duplications, wrong indications etc.	0	1	0	0	0	0	0	0	0
2		2015-05-04 17:16:04	0	0	0	0	0	0	0	0	0	0	0	0	0	0				0		4	4	1	2	1	1	1	4	1	1	2	1	1	1		Pharmacotherapy Modules, Pharmacoeconomics and Biostats, Pharmacokinetics, Workshop	These classes were helpful because they involved forming a basis of knowledge and then being able to apply it in real patient cases and work through problems we would see in real life.	1	MTM is a process that involves looking at all medications a patient is on and assessing them based on indication, need, and accuracy of therapy. It involves a relationship with the patient to manage their medications in a way that is helpful and promotes adherence.	1	1	0	1	0	1	1	1	0
3		2015-05-05 11:05:10	0	0	0	0	0	0	0	0	0	0	0	0	0	0				0		1	3	2	3	1	5	4	4	2	4	4	2	3	5		The modules of course, but also IPS.	The modules provided us the foundational information needed to practice as a pharmacist, but IPS gave us the opportunity to apply it and develop a though process of how to work up a patient and identify drug related problems.	1	MTM sessions are a chance to sit down with a patient and review all of their disease states and medications. It provides an opportunity for a practitioner to examine a patient as a whole, and ensure they have an appropriate medication regimen. It also provides a setting in which patients can ask questions and become more informed about their medications and the conditions they treat.	1	1	0	1	1	1	1	0	0
4		2015-05-04 17:21:02	0	0	0	0	0	0	0	0	0	0	0	0	0	0				1	24	2	3	1	3	1	1	1	3	3	1	2	1	1	3		Honestly, none. Maybe skills lab	Had the most real life application	1	Thoroughly review patient specific medications to ensure their understanding and ensure saftey and compliance and serve as a liaison between the patient and providers	1	1	0	1	1	1	1	0	0
5		2015-05-04 17:45:17	1	1	0	0	0	0	0	0	0	0	0	0	0	0		1	14	1	30	5	3	1	3	1	1	1	3	1	3	1	3	1	0		Pharmacy skills lab, therapeutics modules, IPS	Skills lab, while often not like the real world, was helpful because it provided exercise in communication with patients. Therapeutics modules were vital to learn about counseling points, recommendations, etc. And IPS was helpful for practicing written communication with providers (very applicable to MTM services).	1	Usually, it is a service that is required to be often to patients with certain demographics or disease states. The service entails pharmacists reaching out to these eligible patients, capturing and assessing their medications and disease states and sending relevant recommendations for changes to optimize outcomes/cost, etc. to the provider. Compensation comes from the patient's insurance.	1	1	0	1	1	1	1	1	0
6		2015-05-04 17:57:27	1	0	0	1	0	0	0	0	0	0	0	0	0	0		0		1	11	5	1	1	1	1	1	1	1	1	1	1	1	1	0		All the PTPM classes and labs	Labs were helpful because it's what pharmacists actually do on a daily basis. It's important to get that type of pseudo-real-life experience before APPEs and even IPPEs. Several of my friends didn't know an ACE inhibitor from their left foot by the time they began IPPEs after P1. I had 4.5 years of pharmacy experience as a technician, so I was way ahead of the curve, and it was supplemented by la…	1	A thorough review of a patient's medication record with the intent of discovering any drug-related problems (MRP/DRP) that can be remedied to provide better outcomes to the patient.	1	1	0	1	1	1	1	0	0
7		[not completed]	0	0	0	0	0	0	0	0	0	0	0	0	0	0				0																					0	0	0	0	0	0	0	0	0
8		2015-05-04 19:19:00	1	1	0	0	0	0	0	0	0	0	0	0	0	0		1	20	1	30	5	4	4	4	2	1	1	4	4	3	1	5	3	0		Family medicine	Very helpful	1	Optimizing a patients medication regimen to obtain maximal benefit from it.	1	1	0	1	1	1	1	0	0
9		2015-05-04 20:40:02	1	0	0	0	1	0	0	0	0	0	0	0	0	0		1	10	1	35	1	1	1	5	1	1	1	1	1	1	1	1	1	3		If anything in particular I would say Health and Human Values as it stressed the importance of communication on a professional level requiring a depth of knowledge in whatever the subject matter was. This is something that was commonly encountered in all APPE rotations that is not dependent on memorization of brand/generic/indication/adverse effects etc...	COMMUNICATION.... even if it was communicating that you didn't know or understand something. This is something that was commonly encountered in all APPE rotations that is not dependent on memorization of brand/generic/indication/adverse effects etc...	1	It is a thorough and systematic evaluation of a patients medication profile to ensure proper and appropriate use of medications, adequate and necessary medications/immunizations, and communication with the patient ensuring complete understanding of their medications and their purpose.	1	1	0	1	1	1	1	0	0
10		2015-05-04 21:21:46	0	0	0	0	0	0	0	0	0	0	0	0	0	0				0		5	1	1	1	1	1	1	1	1	1	1	1	1	0		Self care, all Modules, Skills Lab	Self care covered a lot of OTC that you would not have seen elsewhere. Modules although at times scattered did lay a good foundation for recognizing medications and there place in therapy. Skills lab was helpful for communication and other skills not learned elsewhere.	1	Where a pharmacist works with a patient to reconcile their medications and address any issues relating to these medications. And possibly help patient decrease pill burden, create a schedule to increase adherence, discuss side effects, etc.	1	1	0	1	0	1	1	0	0
11		[not completed]	1	1	0	0	0	0	0	0	0	0	0	0	0	0		1	20	1	36	5	1	1	4	5	5	3	5	4	2	3	3	1	0		Na	Na	1	Na	1	1	0	1	0	1	1	0	0
12		2015-05-04 22:36:36	0	0	0	0	0	0	0	0	0	0	0	0	0	0				0		2	1	1	2	5	1	1	5	1	1	2	1	1	4		Elective: Family Medicine Some aspects of Pharmacy Skills Lab	They provided actual projects that were required for rotation, between short presentations, analyzing studies, DIQs, SOAP notes, Practice MTM etc	1	Medication Therapy Management, is a process in which providers and patients can review a persons medications, indications, side effects, review medication list for interactions etc.	1	1	0	1	1	1	1	0	0
13		2015-05-04 23:04:28	1	1	0	0	0	0	0	0	0	0	0	0	0	0		1	10	0		1	2	3	4	5	4	3	2	1	1	2	3	3	0		Cardio	Yes very helpful	1	Reviewing a patients medications for accuracy and necessity	1	0	0	0	0	0	0	0	0
14		2015-05-05 00:06:45	1	0	0	0	0	0	0	0	1	0	0	0	0	0		1	16	1	24	2	3	2	3	1	1	1	5	3	3	3	3	5	7		skills lab	counseling skills, calculations, compounding	1	medication therapy management: helping patients better understand their medication regimens: how and when to take each drug and why they are taking it. doing a thorough check of all medications (Rx, OTC and herbal) can stop/prevent ADRs and catch therapeutic duplications.	0	0	0	1	0	0	0	0	0
15		2015-05-05 08:07:46	1	0	1	0	0	0	0	0	0	0	0	0	0	0		0		1	40	5	5	3	4	5	3	3	5	3	4	3	1	3	1		At COLLEGE - inpatient/institutional rotations, cardiology, GU, infectious disease, health care human values. At University of XY - Set to take their two week boards review	Extremely helpful in material, great faculty, great set up of the course, and very 'hands on' active learning.	1	A group of services that optimize therapeutic outcomes for individual patients.	1	1	0	1	1	1	1	0	0
16		2015-05-05 08:22:50	1	1	0	0	0	0	0	0	0	0	0	0	0	0		1	8 hours	1	40 hours	5	4	1	5	1	1	1	3	4	4	1	1	1	0		IPS & self-care	Self care is the only course you learn about OTCs (although is should be extended and not as crammed) and then IPS allows you to take what you've learned in the class room and solve problems for real cases. It also is the class to teach you how to write good SOAP notes and gives you a lot of practice. Preceptors expect you to have this format mastered by the time you reach your APPE rotations.	1	Medication therapy management is reviewing patient profiles, and making recommendations to the provider on ways to optimize their therapy (duplication of therapy, misising therapy, etc.) in addition to reviewing the medications with the patient to make sure they know what their medications and how they are suppose to be taken.	1	1	0	1	1	1	1	0	0
17		2015-05-05 09:48:11	1	0	0	0	0	0	0	0	1	0	0	0	0	0		1	15	1	40	1	3	1	1	5	1	1	5	3	3	1	1	1	4		I believe they are all needed to play a role in developing because of the topics that come up. IPS was actually the most realistic setting as far as the classroom goes to what you might expect.	It is an example of a chart or a concern of a patient, that is of course a mock situation but it can be helpful if done correctly. The course needs a ton of work though and it really needs be done better as far as coordinating topics and linking things. That's just the truth behind it.	1	MTM is the pulling together of all the patients services and medications and trying to streamline them to a route that is best for them.	1	1	0	1	1	1	1	0	0
18		2015-05-05 09:30:33	1	1	0	0	0	0	0	0	0	0	0	0	0	0		1	30	1	40	5	4	4	4	4	1	1	3	1	4	1	3	1	0		Pediatric elective Family Medicine elective Scientific Literature evaluation IPS	These classes were helpful because they provided real life examples. The work was just right and it was a nice review course for what we needed.	1	It is a service that allows pharmacy to help patient understand their medications. It also allows us to address the concerns of patients that they might have if they are too afraid to talk to the MD about it. It allows us to coordinate with other health team professionals for better continuum of care and transition of care. MTM allows us to help with polypharmacy.	1	1	1	1	0	1	1	0	0
19		2015-05-05 10:10:35	1	1	0	0	0	0	0	0	0	0	0	0	0	0		1	12	1	30	5	4	4	5	1	1	1	3	5	4	1	4	1	0		I utilized what I learned in IPS ALOT during my APPE rotations. Other than that, all the modules and electives played a role at one point or another.	IPS forced you to prioritized treatment plans on patients with complicated comorbidities. You don't really get that in-depth practice in any of your other module class so IPS in retrospect was the most useful. Additionally, I recognized a lot of the practice cases when I was rounding.	1	Medication therapy management is the comprehensive review of a patient's chart with the patient/caregiver. From this process you apply your own clinical knowledge and addressing gaps in care, interactions, potential cost saving opportunities, and so forth. At the end of the day, it is tailoring a medication regimen that best fits the patient in a way that maximizes the benefits they receive in th…	1	1	0	1	0	1	1	0	0
20		2015-05-05 11:47:40	0	0	0	0	0	0	0	0	0	0	0	0	0	0				0		4	4	2	2	3	3	2	3	2	2	3	3	3	1		oncology	none	0		1	1	0	1	1	0	1	1	0
21		2015-05-05 10:43:02	1	0	1	0	0	0	0	0	0	0	0	0	0	0		0		1	40	1	5	1	1	1	1	1	1	1	1	1	1	1	1		Modules and pharmacy administration	They taught the necessary clinical skills and how pharmacies run.	1	Medication therapy management is the process by which a pharmacist or other healthcare provider periodically reviews a patient's medications for appropriateness, safety and efficacy.	1	1	1	1	1	1	1	0	0
22		2015-05-05 11:54:50	1	1	0	0	0	0	0	0	0	0	0	0	0	0		1	15	1	30-40	5	3	1	4	1	1	1	1	4	1	1	3	1	0		-	-	1	-	0	1	0	1	0	1	1	0	0
23		2015-05-05 12:36:42	0	0	0	0	0	0	0	0	0	0	0	0	0	0				0		5	1	4	4	1	1	1	2	2	1	1	2	2	0		Advanced OTC, Family Medicine	Advanced OTC increased knowledge of OTCs beyond what Self Care taught. Family medicine tied all three years of class room knowledge together and taught us to think like a clinical pharmacist.	1	MTM allows pharmacists to help patients get the most benefit from their medications by identifying medication related problems and resolving them. Ideally, MTM would prevent medication related problems.	1	1	1	1	1	1	1	0	0
24		2015-05-05 12:58:16	1	0	0	0	1	0	0	0	0	0	0	0	0	0		1	15	1	35	5	4	3	5	1	1	1	1	1	3	2	2	2	0		pharmacy skills lab	introduced us to the things we would see on rotations.	1	MTM is a service that allows patients to gain more information about their treatments by speaking with a pharmacist in detail about their medications. It also provides an opportunity for pharmacists to identify any interactions or inappropriate treatments. Also can help increase compliance.	1	1	0	1	0	1	1	0	0
25		2015-05-05 14:30:54	1	1	0	0	0	0	0	0	0	0	0	0	0	0		1	20	1	30	5	4	4	4	3	3	3	3	3	2	2	3	2	0		IPS Module courses	IPS provided a sense of bringing patient cases together in more real life situations compared to in each module cases were isolated to specific problems. Brings together the big picture and clinical thinking.	1	Services provided that look at individual patients medications and optimize their therapy for that patient.	1	1	0	1	1	1	1	0	0
26		2015-05-05 15:58:07	1	0	0	1	0	0	0	0	0	0	0	0	0	0		1	5	1	30	5	3	3	3	1	1	1	1	1	3	1	1	1	0		IPS	They provided real situations that we could come across in real life	1	Gathering information from a patient's profile looking for discrepancies, medication errors, adherence, interactions, etc. From this, the pharmacist would sit down with the patient, gather more information, and then come up with a care plan which they would also share with the doctor.	1	1	0	1	0	1	1	0	0
27		2015-05-05 17:40:06	1	0	0	0	1	0	0	0	0	0	0	0	0	0		0		1	40	3	2	1	3	5	1	1	5	3	3	1	1	1	4		Modules	gave information regarding disease states and treatment therapies	1	reviewing patients medications and ensuring they are on appropriate guideline therapies and if they are not document why they are. It allows for reducing medication costs and unnecessary therapies	1	1	0	1	1	1	1	1	0
28		2015-05-05 20:50:51	1	0	1	0	0	0	0	0	0	0	0	0	0	0		0		1	40	4	4	3	3	2	1	1	2	1	1	3	5	1	10		All of the PTPM modules, Skills Lab, and IPS workshop	Pharmacy Administration, pharmacokinetics	1	Managing people's health especially those with multiple medications and disease states. To ensure no unsafe drug interactions are present, no overdosing, adherence, or other issues.	1	0	0	1	1	1	1	0	0
29		2015-05-05 22:57:59	1	1	0	0	0	0	0	0	0	0	0	0	0	0		1	20	1	40+	5	3	1	3	1	1	1	1	1	1	1	1	1	0		Nephrology - Dr. B Cardio - Dr. R Neuro - Dr. G	In my opinion these three professors helped prepare me the best for rotations. They didn't coddle the students during class; they were fair and expected that you do work to earn your grade. I felt prepared leaving their classes.	1	MTM is using a fine toothed comb to go through a patient's medications, find potential errors and correct them. It also gives an opportunity to find problems with the patient such as a knowledge gap or adherence issues.	0	1	0	1	1	1	1	1	0
30		2015-05-06 11:49:53	1	1	0	0	0	0	0	0	0	0	0	0	0	0		0		0		5	4	3	5	1	1	2	2	3	2	2	2	3	3		PTPM	learning about the medications	1	A service provided by pharmacists/ pharmacy students to optimize healthcare. It would lessen medication errors and increase compliance.	0	1	0	1	1	1	1	0	0
31		2015-05-07 05:02:44	1	0	1	0	0	0	0	0	1	0	0	0	0	0		0		1	40 hours	5	4	2	2	1	1	1	4	1	1	1	1	1	0		Excell	Us and Global IPS Foundations	1	MTM is medical care provided by pharmacists whose aim is to optimize drug therapy and improve therapeutic outcomes for patients	1	1	1	1	1	1	1	0	0
32		2015-05-08 15:37:17	1	1	0	0	0	0	0	0	0	0	0	0	0	0		1	8	0		4	4	5	5	2	2	2	4	3	2	2	4	4	2		workshop, skills lab	best places to use all book information and develop skills to integrate information needed for patient care	1	MTM ensures patients are taking optimal medication regimen for their disease states. MTM helps Confirm patients understands why the medications are important	0	1	0	1	1	1	1	0	0
33		[not completed]	0	0	0	0	0	0	0	0	0	0	0	0	0	0				0																					0	0	0	0	0	0	0	0	0
34		2015-05-11 13:14:12	1	0	0	0	1	0	0	0	0	0	0	0	0	0		0		1	40	2	1	1	2	5	1	1	5	2	3	1	1	1	7		IPS, neuro/psych module	IPS helped me to assess a patient and come up with a plan. Many of my rotations required formal SOAP notes. For almost all of my rotations I used this assessment process to identify medication related problems in patients I was following in the ICU, ER, cardiac care unit and am care site. I also think that Dr. English did an excellent job teaching us during the neuro/psych module and I felt well …	1	A health service provided by pharmacists to assess a patients medication regimen for appropriateness, solve medication related problems, and improve health care outcomes.	1	0	0	1	1	1	1	0	0
35		2015-05-11 13:25:15	1	1	0	0	0	0	0	0	0	0	0	0	0	0		0		0		5	4	4	4	1	1	1	1	3	3	3	3	3	0		The following modules were helpful: respiratory and diabetes. I wish self-care was more helpful.	Most of the people I interact with either have asthma or COPD and/or diabetes so these courses were extremely helpful. They were too short in terms of module length but they were well organized.	1	MTM is a way for pharmacists to analyze and evaluate a patient's current medical plan and make recommendations to the patient and patient's doctor with emphasis on medications and immunizations.	1	1	0	1	0	1	1	0	0
36		2015-05-11 14:26:13	0	0	0	0	0	0	0	0	0	0	0	0	0	0				0		5	4	4	4	2	2	1	3	3	1	3	3	1	0		Cardiology Endocrine	Material comes up quite frequently	1	Reviewing patient's medication history and medications to ensure that their regimen is correct and answer questions for the patients. Trying to make regimens accurate and easy to follow for our patients.	1	1	0	1	1	1	1	0	0
37		2015-05-11 18:39:21	1	0	0	1	0	0	0	0	0	0	0	0	0	0		1	9	1	40	5	2	2	2	2	2	2	2	2	2	1	2	2	2		Skills Lab	Compounding and being hands on	1	Reviewing patients medications and disease states and educate and counsel on any areas for improvement	1	1	0	1	1	1	1	1	0
38		2015-05-11 19:55:32	1	0	0	1	0	0	0	0	0	0	0	0	0	0		1	10	1	40	4	4	5	5	2	2	2	1	4	1	1	5	1	2		Cardio, endocrine	Yes	1	Providing medication and lifestyle counseling for patients to provide them with the knowledge they need to better manage their own health	1	1	0	1	1	0	1	0	0
39		2015-05-11 20:40:19	1	1	0	0	1	0	0	0	0	0	0	0	0	0		0		1	15	1	1	1	3	1	1	1	4	3	5	5	2	1	10		Most of the PTPM classes were useful in preparing me for rotations	The classes covered most of the therapeutic knowledge needed during APPE rotations	1	Medication therapy management involves being able to review a patients medication profile and determine what medications are appropriate give medical history and diagnosis. It entails optimization of a patients pharmaceutical care for better patient outcomes.	1	1	0	1	1	1	1	1	0
40		2015-05-12 09:57:47	1	1	0	0	0	0	0	0	0	0	0	0	0	0		1	2015-08-16	1	40	5	3	3	3	4	4	4	4	3	4	1	2	1	0		Health care and Human values, human anatomy	physics	1	A chance for a pharmacists and patient to interaction and have a conversation over the patients disease states and current health state. Allows the patient to ask questions and the pharmacist to make meaningful recommendations.	0	1	0	0	0	0	0	0	0
41		2015-05-14 07:07:40	1	1	0	0	0	0	0	0	1	0	0	0	0	0		1	35	1	50	4	1	1	1	1	1	1	4	1	1	1	1	2	7		Nephro	Na	1	Individualized care	0	1	0	0	0	1	1	0	0
42		2015-05-14 07:20:04	1	1	0	0	0	0	0	0	0	0	0	0	0	0		1	20	1	40	5	1	5	1	1	1	1	1	1	1	1	1	1	2		All of P2 and P3 courses. Drug information wasn't helpful or interesting at first, but it is one of the most important class for APPE.	It is not possible to walk around knowing everything. It is better to know where to find reputatable information and DRug Information taught me just that.	1	MTM using clinical knowlegde to help patients optimize their medications in the setting of more than two chronic illnesses and polypharmacy to reduce healthcare cost for the individual and the federal healthcare system.	1	1	0	1	1	1	1	0	0
43		2015-05-14 08:05:17	1	0	0	0	1	0	0	0	0	0	0	0	0	0		1	20	1	30	5	5	5	4	3	3	3	4	4	3	4	4	4	0		Very difficult to just pick one. Every single course was detrimental to my success during rotations	Classes prepared me to be efficient in applying the knowledge I acquired in the various courses	1	Broad range of healthcare services provided by pharmacists as part of a healthcare team	0	1	0	1	0	1	1	1	0
44		[not completed]	1	1	0	0	0	0	0	0	0	0	0	0	0	0		1	40	1	40	4	1	3	4	3	2	1	3	3	1	1	4	1	0		therapeutics.	global health			0	0	0	0	0	0	0	0	0
45		2015-05-14 08:16:47	1	0	1	0	0	0	0	0	0	0	0	0	0	0		0		1	20	5	1	1	1	1	1	1	1	1	1	1	1	1	0		Self-Care, Drug Information, Skills Lab	Gave a good amount of background info for recommendations, learned how to find valuable information, learned basic skills of the pharmacist	1	MTM is managing a patients medications to reduce the occurrence of serious adverse events due to over or under utilization of medication	1	1	1	1	1	0	1	0	0
46		[not completed]		0	0	0	0	0	0	0	0	0	0	0	0	0																									0	0	0	0	0	0	0	0	0
47		[not completed]	1	1	0	0	0	0	0	0	0	0	0	0	0	0		1	10	1	25	1	1	1	1	5	1	3	4	2	3	2	3	1	4		IPS, PTPM	Documentation, therapeutics			0	0	0	0	0	0	0	0	0
48		2015-05-14 11:40:00	1	0	1	0	0	0	0	0	0	0	0	0	0	0		0		1	36	1	1	1	1	5	1	1	5	1	5	1	1	1	4		Family medicine elective, PTPM courses, skills lab V and VI	My rotations were heavily represented by family medicine so that elective was a great introduction. PTPM courses provided the first insight at appropriate medications and dosing. Lastly, skills lab was good at starting to introduce patient assessment.	1	A pharmacist led review of patient medications and goals to optimize the use of safe and effective therapy	1	1	0	1	1	1	1	0	0
49		2015-05-14 14:14:01	1	1	0	0	0	0	0	0	0	0	0	0	0	0		1	15-20	1	40	1	2	1	2	4	4	5	5	4	5	5	4	5	6		Nephrology Medicinal Chemistry/Pharmacology Neuropsych	-What goes in must go out- and the kidneys are heavily involved in that. -Mechanism based understanding of medication effects. -Took 2 psych rotations in the interest of entering a residency in this field.	1	Medication services post-diagnosis that allow a pharmacist to handle the therapeutic regimen of a patient, adjusting for changes in severity of disease state, other organ system dysfunction, adverse effects, and duration of treatment without the need to consult the diagnosing physician prior to adjustment.	1	1	0	1	1	1	1	1	0
50		2015-05-15 09:14:14	1	0	1	0	0	0	0	0	0	0	0	0	0	0		1	15	1	30	1	5	1	2	5	1	1	5	1	5	1	1	1	4		All of the module systems. It's unrealistic to pick only one, as rarely are there patients that we will encounter that have purely one disease state.	They helped me establish a framework in which I can expand my knowledge moving forward. I realized once on APPE's that Pharmacy school doesn't truly teach me how to be a complete pharmacist, but rather teaches me how to learn, as there is simply too much information to learn in the time allocated.	1	MTM is a program designed to allow a healthcare practitioner, preferably but not exclusively a pharmacist, to comprehensively review both an existing pharmacotherapy regimen and reconcile it with a current patients level of health and co-morbidities. Once the evaluation is complete, and effective MTM session will result in a tailored plan of care to help the patient achieve their health goals and…	1	1	0	1	1	0	1	0	0
																					A	3.61702	2.76596	2.23404	2.95745	2.42553	1.7234	1.65957	3.06383	2.29787	2.40426	1.87234	2.19149	1.70213
																					STD	1.70106	1.41748	1.41748	1.38246	1.67779	1.2459	1.12823	1.52379	1.26688	1.40897	1.20897	1.29612	1.10132
[truncated: 37 more columns]
